# Supplementary material for: Venous thromboembolism is associated with graft-versus-host disease and increased non-relapse mortality after allogeneic hematopoietic stem cell transplantation
Source: PubMed Central journal article supplement — Haematologica. 2017 Mar 24;102(7):1185–91. doi: 10.3324/haematol.2017.164012 (PMC5566023; doi:10.3324/haematol.2017.164012), 2017-07
Supplement: 2017_164012-Disclosures_and_Contributions.pdf [file 2017_164012-Disclosures_and_Contributions.pdf]

Haematologica  
HAEMATOL/2017/164012  
Version 3

Venous thromboembolism is associated with graft-versus-host disease and increased non-relapse mortality after allogeneic hematopoietic stem cell transplantation

Natasha Kekre, Haesook T. Kim, Vincent T. Ho, Corey Cutler, Philippe Armand, Sarah Nikiforow, Edwin P. Alyea, Robert J. Soiffer, Joseph H. Antin, Jean M. Connors, and John Koreth

Disclosures: Conflict-of-interest disclosure: The authors declare no competing financial interests.

Contributions: N.K. performed the research, wrote and reviewed the manuscript. H.T.K. analyzed the data, wrote and reviewed the manuscript. C.C., P.A., J.H.A., S.N., V.T.H., E.P.A., and R.J.S contributed to patient care and reviewed the manuscript. J.K and J.M.C. designed the research, analyzed the data, contributed to patient care, wrote and reviewed the manuscript.
